# Supplementary material
Source: PubMed Central journal article supplement (PMC5962965)
Supplement: nmx003_supp.pdf [file nmx003_supp.pdf]

## Online Supporting Material

**Supplemental Table 1.** Details of countries searched and presence of snacking recommendation¶

| Country                 | Dietary guidelines | Number of Snacking Recommendations | References |
|-------------------------|--------------------|------------------------------------|------------|
| Afghanistan             | NO                 |                                    |            |
| Albania                 | YES                | 4                                  | (44)       |
| Algeria                 | NO                 |                                    |            |
| Andorra                 | NO                 |                                    |            |
| Angola                  | NO                 |                                    |            |
| Antigua and Barbuda     | YES                | NO                                 |            |
| Argentina               | YES                | NO                                 |            |
| Armenia                 | NO                 |                                    |            |
| Australia               | YES                | 1                                  | (44)       |
| Austria**               | YES                | 4                                  | (3-6)      |
| Azerbaijan              | NO                 |                                    |            |
| Bahamas                 | YES                | NO                                 |            |
| Bahrain                 | NO                 |                                    |            |
| Bangladesh              | YES                | NO                                 |            |
| Barbados                | YES                | NO                                 |            |
| Belarus                 | NO                 |                                    |            |
| Belgium**               | YES                | 2                                  | (7, 8)     |
| Belize                  | YES                | 1                                  | (9)        |
| Benin                   | NO                 |                                    |            |
| Bhutan                  | NO                 |                                    |            |
| Bolivia                 | NO                 |                                    |            |
| Bosnia and Herzegovina* | YES                |                                    |            |
| Botswana                | NO                 |                                    |            |
| Brazil**                | YES                | 4                                  | (10-13)    |
| Brunei                  | NO                 |                                    |            |
| Bulgaria                | NO                 |                                    |            |

## Online Supporting Material

|                                   |     |                                      |          |
|-----------------------------------|-----|--------------------------------------|----------|
| Burkina Faso                      | NO  |                                      |          |
| Burundi                           | NO  |                                      |          |
| Cabo Verde                        | NO  |                                      |          |
| Cambodia                          | NO  |                                      |          |
| Cameroon                          | NO  |                                      |          |
| Canada                            | YES | 7                                    | (14-20)  |
| Central African Republic          | NO  |                                      |          |
| Chad                              | NO  |                                      |          |
| Chile                             | YES | 2                                    | (21)     |
| China**                           | YES | 4                                    | (22, 23) |
| Colombia**                        | YES | NO                                   |          |
| Comoros                           | NO  |                                      |          |
| Congo, Democratic Republic of the | NO  |                                      |          |
| Congo, Republic of the            | NO  |                                      |          |
| Costa Rica*                       | YES |                                      |          |
| Cote d'Ivoire                     | NO  |                                      |          |
| Croatia                           | YES | 1                                    | (24)     |
| Cuba*                             | YES |                                      |          |
| Cyprus                            | NO  |                                      |          |
| Czech Republic                    | NO  |                                      |          |
| Denmark*                          | YES | 2                                    | (25)     |
| Djibouti                          | NO  |                                      |          |
| Dominica                          | YES | 1                                    | (26)     |
| Dominican Republic*               | YES |                                      |          |
| Ecuador**                         | YES | NO (just for children under 2 years) |          |
| Egypt*                            | YES |                                      |          |
| El Salvador*                      | YES |                                      |          |
| Equatorial Guinea                 | NO  |                                      |          |
| Eritrea                           | NO  |                                      |          |
| Estonia*                          | YES |                                      |          |

## Online Supporting Material

|               |     |    |          |
|---------------|-----|----|----------|
| Ethiopia      | NO  |    |          |
| Fiji          | YES | 2  | (27)     |
| Finland*      | YES |    |          |
| France**      | YES | 2  | (28, 29) |
| Gabon         | NO  |    |          |
| Gambia        | NO  |    |          |
| Georgia       | YES | 3  | (30)     |
| Germany**     | YES | 3  | (31, 32) |
| Ghana         | NO  |    |          |
| Greece        | YES | 1  | (33)     |
| Greenland     | YES | 2  | (34)     |
| Grenada       | YES | 1  | (35)     |
| Guatemala     | YES | NO |          |
| Guinea        | NO  |    |          |
| Guinea-Bissau | NO  |    |          |
| Guyana        | YES | NO |          |
| Haiti         | NO  |    |          |
| Honduras*     | YES |    |          |
| Hungary       | YES | 1  | (36)     |
| Iceland*      | YES |    |          |
| India         | YES | 12 | (37-47)  |
| Indonesia     | NO  |    |          |
| Iran          | YES | NO |          |
| Iraq          | NO  |    |          |
| Ireland       | YES | 2  | (48, 49) |
| Israel*       | YES |    |          |
| Italy         | YES | NO |          |
| Jamaica       | NO  |    |          |
| Japan         | YES | 1  | (50)     |
| Jordan        | NO  |    |          |
| Kazakhstan    | NO  |    |          |

## Online Supporting Material

|                  |     |    |          |
|------------------|-----|----|----------|
| Kenya            | NO  |    |          |
| Kiribati         | NO  |    |          |
| Kosovo           | NO  |    |          |
| Kuwait           | NO  |    |          |
| Kyrgyzstan       | NO  |    |          |
| Laos             | NO  |    |          |
| Latvia*          | YES |    |          |
| Lebanon          | YES | 1  | (51)     |
| Lesotho          | NO  |    |          |
| Liberia          | NO  |    |          |
| Libya            | NO  |    |          |
| Liechtenstein    | NO  |    |          |
| Lithuania        | NO  |    |          |
| Luxembourg       | NO  |    |          |
| Macedonia*       | YES |    |          |
| Madagascar       | NO  |    |          |
| Malawi           | YES | 2  | (52)     |
| Malaysia         | YES | 7  | (53-59)  |
| Maldives         | NO  |    |          |
| Mali             | NO  |    |          |
| Malta            | YES | NO |          |
| Marshall Islands | NO  |    |          |
| Mauritania       | NO  |    |          |
| Mauritius        | NO  |    |          |
| Mexico**         | YES | 3  | (60, 61) |
| Micronesia       | NO  |    |          |
| Moldova          | NO  |    |          |
| Monaco           | NO  |    |          |
| Mongolia         | YES | NO |          |
| Montenegro       | NO  |    |          |
| Morocco          | NO  |    |          |

## Online Supporting Material

|                       |     |    |         |
|-----------------------|-----|----|---------|
| Mozambique            | NO  |    |         |
| Myanmar (Burma)       | NO  |    |         |
| Namibia               | YES | 2  | (62)    |
| Nauru                 | NO  |    |         |
| Nepal                 | YES | NO |         |
| Netherlands**§        | YES | 1  | (63)    |
| New Zealand           | YES | 4  | (64-68) |
| Nicaragua             | NO  |    |         |
| Niger                 | NO  |    |         |
| Nigeria               | YES | 2  | (69)    |
| North Korea           | NO  |    |         |
| Norway                | YES | NO |         |
| Oman                  | YES | 1  | (70)    |
| Pakistan              | NO  |    |         |
| Palau                 | NO  |    |         |
| Palestine             | NO  |    |         |
| Panama*               | YES |    |         |
| Papua New Guinea      | NO  |    |         |
| Paraguay*             | YES |    |         |
| Peru                  | YES | NO |         |
| Philippines           | YES | 1  | (71)    |
| Poland*               | YES |    |         |
| Portugal**            | YES | 9  | (72-74) |
| Qatar                 | YES | 1  | (75)    |
| Romania*              | YES |    |         |
| Russia**              | YES | 1  | (76)    |
| Rwanda                | NO  |    |         |
| Samoa                 | NO  |    |         |
| San Marino            | NO  |    |         |
| Sao Tome and Principe | NO  |    |         |
| Saudi Arabia          | YES | 1  | (77)    |

## Online Supporting Material

|                                |     |    |         |
|--------------------------------|-----|----|---------|
| Senegal                        | NO  |    |         |
| Serbia                         | NO  |    |         |
| Seychelles                     | NO  |    |         |
| Sierra Leone                   | NO  |    |         |
| Singapore                      | NO  |    |         |
| Slovakia                       | NO  |    |         |
| Slovenia                       | NO  |    |         |
| Solomon Islands                | NO  |    |         |
| Somalia                        | NO  |    |         |
| South Africa                   | YES | 4  | (78-81) |
| South Korea*                   | YES |    |         |
| South Sudan                    | NO  |    |         |
| Spain                          | YES | NO |         |
| Sri Lanka                      | YES | 2  | (82)    |
| St. Kitts and Nevis            | YES | 1  | (83)    |
| St. Lucia                      | YES | 1  | (84)    |
| St. Vincent and The Grenadines | YES | 1  | (85)    |
| Sudan                          | NO  |    |         |
| Suriname                       | NO  |    |         |
| Swaziland                      | NO  |    |         |
| Sweden                         | YES | 1  | (86)    |
| Switzerland**                  | YES | 1  | (87)    |
| Syria                          | NO  |    |         |
| Taiwan                         | NO  |    |         |
| Tajikistan                     | NO  |    |         |
| Tanzania                       | NO  |    |         |
| Thailand                       | YES | 1  | (88)    |
| Timor-Leste                    | NO  |    |         |
| Togo                           | NO  |    |         |
| Tonga                          | NO  |    |         |

## Online Supporting Material

|                                |     |    |          |
|--------------------------------|-----|----|----------|
| Trinidad and Tobago            | NO  |    |          |
| Tunisia                        | NO  |    |          |
| Turkey                         | YES | 1  | (89)     |
| Turkmenistan                   | NO  |    |          |
| Tuvalu                         | NO  |    |          |
| Uganda                         | NO  |    |          |
| UK (United Kingdom)            | YES | 4  | (90-94)  |
| Ukraine**                      | YES | 1  | (95)     |
| United Arab Emirates           | NO  |    |          |
| Uruguay                        | NO  |    |          |
| USA (United States of America) | YES | 19 | (96-104) |
| Uzbekistan                     | NO  |    |          |
| Vanuatu                        | NO  |    |          |
| Vatican City (Holy See)        | NO  |    |          |
| Venezuela                      | YES | NO |          |
| Vietnam*                       | YES |    |          |
| Yemen                          | NO  |    |          |
| Zambia                         | NO  |    |          |
| Zimbabwe                       | NO  |    |          |

¶Note reference sources may provide >1 recommendation hence numbers of recommendations and references may not tally.\*not translated. \*\*translated. § During the time of the review the Dutch guidelines were updated and the latest guidelines did not include any recommendations specific to snacking. For the purpose of this review the old guidelines as identified in the first wave of the literature search were retained.

([http://www.voedingscentrum.nl/Assets/Uploads/voedingscentrum/Documents/Consumenten/Schijf%20van%20Vijf%202016/VC\\_Richtlijnen\\_Schijf\\_van\\_Vijf\\_2016.pdf](http://www.voedingscentrum.nl/Assets/Uploads/voedingscentrum/Documents/Consumenten/Schijf%20van%20Vijf%202016/VC_Richtlijnen_Schijf_van_Vijf_2016.pdf))

## Online Supporting Material

**Supplemental Table 2** Details of all countries surveyed and the nature of the recommendations identified (qualitative or quantitative) and whether a rationale was provided.

| Country   | Target Group                                      | Qualitative Recommendations | Quantitative Recommendations | Rationale of Qualitative or Quantitative Recommendation |
|-----------|---------------------------------------------------|-----------------------------|------------------------------|---------------------------------------------------------|
| Australia | general population                                |                             | x                            |                                                         |
| Austria   | general population                                | x                           |                              |                                                         |
| Austria   | General population                                |                             | x                            | x                                                       |
| Belize    | general population                                | x                           |                              |                                                         |
| Brazil    | general population                                |                             | x                            | x                                                       |
| Canada    | general population                                | x                           |                              |                                                         |
| Canada    | general population (First Nations, Inuit & Métis) | x                           |                              |                                                         |
| Chile     | general population                                |                             | x                            | x                                                       |
| China     | general population                                | x                           |                              |                                                         |
| Croatia   | general population                                |                             | x                            |                                                         |
| Denmark   | general population                                |                             | x                            | x                                                       |
| Dominica  | general population                                | x                           |                              |                                                         |
| Fiji      | general population                                | x                           | x                            | x                                                       |
| France    | general population                                | x                           | x                            |                                                         |
| Germany   | general population                                | x                           |                              |                                                         |
| Germany   | general population                                |                             | x                            | x                                                       |
| Greece    | general population                                | x                           |                              |                                                         |
| Greenland | general population                                | x                           |                              |                                                         |
| Greenland | general population                                |                             |                              | x                                                       |
| Grenada   | general population                                | x                           |                              |                                                         |
| India     | general population                                | x                           | x                            | x                                                       |
| India     | general population                                |                             | x                            |                                                         |
| India     | general population                                |                             | x                            |                                                         |
| India     | general population                                |                             | x                            |                                                         |



## Online Supporting Material

|                                  |                    |   |   |   |
|----------------------------------|--------------------|---|---|---|
| India                            | general population |   | x |   |
| India                            | general population |   | x |   |
| India                            | general population |   | x |   |
| India                            | general population | x |   |   |
| India                            | general population | x |   |   |
| India                            | general population | x |   |   |
| India                            | general population | x |   |   |
| India                            | general population | x |   |   |
| Ireland                          | general population | x |   |   |
| Japan                            | general population | x |   | x |
| Malaysia                         | general population |   | x |   |
| Malaysia                         | general population |   | x | x |
| Malaysia                         | general population |   |   | x |
| Mexico                           | general population |   | x |   |
| Namibia                          | general population |   | x | x |
| Netherlands                      | general population | x |   | x |
| Oman                             | general population | x |   | x |
| Portugal                         | general population | x |   |   |
| Portugal                         | general population |   | x | x |
| Qatar                            | general population | x |   |   |
| Russia                           | general population | x | x |   |
| Saint Kitts and Nevis            | general population | x |   |   |
| Saint Lucia                      | general population | x |   |   |
| Saint Vincent and the Grenadines | general population | x |   |   |
| Saudi Arabia                     | general population |   | x |   |
| South Africa                     | general population | x |   | x |
| Sri Lanka                        | general population | x | x | x |

## Online Supporting Material

|          |                    |   |   |   |
|----------|--------------------|---|---|---|
| Sweden   | general population |   | x | x |
| Thailand | general population |   | x |   |
| Turkey   | general population |   | x |   |
| UK       | general population | x | x | x |
| UK       | general population |   | x |   |
| UK       | general population | x |   |   |
| Ukraine  | general population |   | x |   |
| USA      | general population | x |   | x |
| USA      | general population | x |   |   |
| USA      | general population | x |   | x |
| USA      | general population | x |   |   |
|          |                    |   |   |   |
| Albania  | children > 2 y     |   | x | x |
| Albania  | children 4-6 y     |   | x |   |
| Albania  | children 6-8y      |   | x |   |
| Albania  | children 9-13 y    |   | x |   |
| Austria  | children           | x |   |   |
| Belgium  | children 3-12 y    | x | x |   |
| Brazil   | children           |   | x |   |
| Brazil   | children           |   | x |   |
| Canada   | children           |   |   | x |
| Canada   | children 7 y       |   | x |   |
| Canada   | children 10 y      |   | x |   |
| Canada   | children 12 y      |   | x |   |
| Chile    | children           |   | x |   |
| China    | children 1.3-5 y   | x |   |   |
| China    | children 6-12 y    | x | x |   |
| Denmark  | children           |   | x | x |
| Fiji     | children           | x |   | x |
| France   | children           |   | x |   |

## Online Supporting Material

|              |                          |   |   |   |
|--------------|--------------------------|---|---|---|
| Georgia      | children 1-3 y           | x |   |   |
| Georgia      | children                 |   | x | x |
| Germany      | children                 |   | x | x |
| Ireland      | children                 | x |   |   |
| Malawi       | children 2-5y            | x | x |   |
| Malawi       | children                 | x |   |   |
| Malaysia     | children                 | x |   |   |
| Malaysia     | children                 | x |   |   |
| Malaysia     | school children          |   | x | x |
| Malaysia     | children                 | x |   |   |
| Mexico       | children 1-4 y           | x |   |   |
| Mexico       | children 5-9 y           | x |   |   |
| Namibia      | children                 | x |   | x |
| New Zealand  | children                 | x | x | x |
| New Zealand  | children                 | x | x | x |
| Nigeria      | children 6-11 y          | x |   |   |
| Portugal     | children 1-5 y           |   | x |   |
| Portugal     | kindergarten children    |   | x |   |
| Portugal     | primary school children  |   | x |   |
| Portugal     | kindergarten children    |   | x | x |
| Portugal     | school children          |   | x |   |
| South Africa | children 3-5 y           | x |   |   |
| Sri Lanka    | children                 |   | x |   |
| Switzerland  | children                 | x |   | x |
| UK           | children                 |   | x |   |
| USA          | preschoolers             | x |   |   |
| USA          | pre-schoolers & children | x | x | x |
| USA          | preschoolers & children  | x | x | x |
| USA          | pre-schoolers & children | x |   | x |
| USA          | preschoolers             |   | x |   |
| USA          | preschoolers             | x |   | x |

## Online Supporting Material

|              |                    |   |   |   |
|--------------|--------------------|---|---|---|
| USA          | preschoolers       | x |   |   |
| USA          | children           | x |   |   |
| USA          | children           |   | x | x |
| USA          | children           | x | x | x |
| USA          | children           | x |   | x |
| USA          | children           | x |   | x |
| USA          | children           | x |   | x |
| USA          | children           | x |   |   |
|              |                    |   |   |   |
| Austria      | adults             | x |   | x |
| Belgium      | adults             | x | x |   |
| Brazil       | adults             |   | x |   |
| Canada       | adults             | x | x | x |
| Hungary      | adults             |   | x |   |
| Lebanon      | adults             | x |   |   |
| New Zealand  | adults             | x |   |   |
| New Zealand  | older adults       | x |   | x |
| Philippines  | adults             |   | x |   |
| Portugal     | adults             |   | x |   |
| South Africa | adults             | x |   |   |
| South Africa | adults             | x | x |   |
| China        | children 13-17 y   | x |   |   |
| Georgia      | children 12-18 y   | x |   |   |
| Nigeria      | children 12-18 y   | x |   |   |
| Portugal     | secondary children |   | x |   |
| USA          | high school        | x |   |   |

## Online Supporting Material

**Supplemental table 3.** Detailed overview of recommendations which mention specific food groups to include (fruit, vegetable, juice; starchy foods; combinations of foods; dairy foods; other foods) or to limit. 'Starchy foods' relate to cereal and cereal products, pastas, rice and potatoes; 'Combination of foods' relate to snacks incorporating two or more food groups such as meat or cheese sandwiches, cereal with milk, or crackers with vegetables/fruit and/or cheese; 'Other foods' includes nuts, hummus, seeds etc.; 'Foods to limit' were described as sugar containing beverages and foods, confectionery, chocolates, salty snacks, packaged foods, ultra-processed foods, foods containing fat, saturated fat, trans fat, sugar and/or salt.

| Country                               | Target group       | Fruit, Vegetables, Juice | Starchy Foods | Combination of Foods | Dairy | Other Foods | Foods to limit |
|---------------------------------------|--------------------|--------------------------|---------------|----------------------|-------|-------------|----------------|
| Australia                             | general population |                          |               | x                    | x     |             |                |
| Austria                               | general population |                          |               |                      |       |             | x              |
| Austria                               | general population | x                        |               | x                    |       | x           | x              |
| Belgium                               | general population | x                        | x             | x                    | x     |             | x              |
| Belize                                | general population | x                        |               |                      |       |             | x              |
| Canada                                | general population | x                        | x             | x                    | x     | x           | x              |
| Canada (First Nations, Inuit & Métis) | general population |                          |               |                      |       |             | x              |
| Chile                                 | general population | x                        | x             |                      | x     |             |                |
| China                                 | general population |                          |               |                      |       |             |                |
| Croatia                               | general population | x                        |               |                      | x     | x           |                |
| Dominica                              | general population |                          |               |                      |       |             | x              |
| FAO, Caribbean                        | general population | x                        | x             |                      | x     |             | x              |
| Fiji                                  | general population | x                        | x             | x                    | x     | x           | x              |
| Germany                               | general population | x                        |               |                      |       |             |                |
| Germany                               | general population | x                        | x             |                      | x     | x           | x              |
| Greece                                | general population | x                        |               |                      |       | x           | x              |
| Greenland                             | general population |                          |               |                      |       |             | x              |
| Greenland                             | general population | x                        | x             |                      |       | x           |                |
| Grenada                               | general            |                          |               |                      |       |             | x              |

## Online Supporting Material

|                               |                    |   |   |   |   |   |   |
|-------------------------------|--------------------|---|---|---|---|---|---|
|                               | population         |   |   |   |   |   |   |
| India                         | general population |   |   | x | x |   |   |
| India                         | general population | x | x |   | x | x | x |
| India                         | general population | x |   |   | x | x | x |
| India                         | general population | x |   | x | x | x |   |
| India                         | general population | x |   | x | x | x |   |
| India                         | general population | x |   |   | x | x | x |
| India                         | general population | x |   |   | x | x | x |
| India                         | general population |   |   |   |   |   | x |
| India                         | general population |   |   |   |   |   | x |
| India                         | general population |   |   |   |   |   | x |
| India                         | general population |   |   |   |   |   | x |
| Japan                         | general population |   |   |   |   |   |   |
| Malaysia                      | general population |   |   | x |   | x |   |
| Malaysia                      | general population | x | x | x | x | x |   |
| Malaysia                      | general population |   |   |   |   | x | x |
| Mediterranean Diet foundation | general population | x |   |   |   |   |   |
| Mexico                        | general population |   |   |   |   |   |   |
| Mexico                        | general population |   |   | x | x |   |   |
| Namibia                       | general population |   |   |   |   |   |   |
| Netherlands                   | general population |   |   |   |   |   | x |
| Nordic countries              | general population |   |   |   |   |   | x |
| Oman                          | general population |   |   |   |   |   | x |
| Portugal                      | general population |   |   |   |   |   | x |
| Portugal                      | general population |   |   |   |   |   |   |
| Qatar                         | general population | x |   |   |   |   |   |

## Online Supporting Material

|                                  |                    |   |   |   |   |   |   |
|----------------------------------|--------------------|---|---|---|---|---|---|
| Russia                           | general population | x | x |   | x |   |   |
| Saint Kitts and Nevis            | general population | x |   |   |   |   | x |
| Saint Lucia                      | general population |   |   |   |   |   | x |
| Saint Vincent and the Grenadines | general population |   |   |   |   |   | x |
| South Africa                     | general population |   |   |   |   |   | x |
| South Africa                     | general population | x |   |   |   |   | x |
| Sri Lanka                        | general population | x |   | x | x | x | x |
| Sweden                           | general population |   |   |   |   |   |   |
| Thailand                         | general population | x |   | x | x | x |   |
| Turkey                           | general population | x | x |   | x |   | x |
| UK                               | general population | x | x | x | x | x | x |
| UK                               | general population |   |   | x |   |   | x |
| UK                               | general population | x | x | x | x | x | x |
| Ukraine                          | general population |   |   | x |   |   |   |
| USA                              | general population |   |   |   |   |   | x |
| USA                              | general population |   |   |   | x |   |   |
| USA                              | general population |   | x |   |   |   |   |
| USA                              | general population | x |   |   | x | x |   |
| WHO                              | general population | x |   |   |   |   | x |
| WHO Eastern Mediterranean Region | general population | x | x | x |   |   | x |
|                                  |                    |   |   |   |   |   |   |
| Austria                          | children           | x |   |   |   |   | x |
| Brazil                           | children           | x |   | x |   |   |   |
| Brazil                           | children           |   |   | x |   |   | x |
| Canada                           | children           |   |   |   |   |   |   |
| Chile                            | children           |   |   | x | x |   |   |
| Fiji                             | children           | x |   | x | x | x | x |
| France                           | children           | x | x |   | x | x | x |
| Georgia                          | children           |   |   |   |   |   |   |
| Germany                          | children           |   |   | x |   |   |   |

## Online Supporting Material

|              |                         |   |   |   |   |   |   |
|--------------|-------------------------|---|---|---|---|---|---|
| Ireland      | children                |   |   |   |   |   | x |
| Malawi       | children                |   |   |   |   |   |   |
| Malaysia     | children                |   | x |   |   |   | x |
| Malaysia     | children                | x |   |   |   | x | x |
| Malaysia     | children                | x |   | x | x | x | x |
| Namibia      | children                | x |   |   |   | x |   |
| New Zealand  | children                | x | x | x | x | x | x |
| New Zealand  | children                | x | x | x | x | x | x |
| South Africa | children                |   |   |   |   |   |   |
| Sri Lanka    | children                | x |   |   |   | x | x |
| Switzerland  | children                | x |   |   |   | x | x |
| UK           | children                |   |   | x | x | x |   |
| USA          | children                | x | x |   |   | x |   |
| USA          | children                |   | x |   |   |   |   |
| USA          | children                | x | x | x | x | x |   |
| USA          | children                | x |   |   | x | x |   |
| USA          | children                |   |   |   |   |   | x |
| USA          | children                | x | x | x | x | x |   |
| WHO          | children                | x |   |   |   |   | x |
| USA          | children & preschoolers | x | x |   | x | x |   |
| USA          | children & preschoolers | x | x | x | x | x |   |
| USA          | children & preschoolers |   |   |   |   |   | x |
| Albania      | children > 2 y          | x | x | x | x |   |   |
| China        | children 1.3-5 y        | x |   |   | x |   | x |
| Canada       | children 10 y           | x |   | x |   |   |   |
| Canada       | children 12 y           | x |   | x |   |   |   |
| Georgia      | children 1-3 y          |   |   | x |   |   | x |
| Mexico       | children 1-4 y          |   |   | x | x |   |   |
| Portugal     | children 1-5 y          | x |   | x | x | x |   |
| Malawi       | children 2-5y           | x |   |   |   | x |   |
| South Africa | children 3-5 y          |   |   |   |   |   | x |
| Albania      | children 4-6 y          | x |   | x |   |   |   |
| Mexico       | children 5-9 y          |   |   | x | x |   |   |
| Nigeria      | children 6-11 y         |   |   |   |   |   | x |
| China        | children 6-12 y         | x |   |   | x | x | x |
| Albania      | children 6-8y           | x | x | x |   |   |   |
| Canada       | children 7 y            | x | x | x |   |   |   |
| Albania      | children 9-13 y         | x | x | x |   |   |   |
| Portugal     | kindergarten children   |   |   | x |   |   |   |



## Online Supporting Material

|              |                         |   |   |   |   |   |   |
|--------------|-------------------------|---|---|---|---|---|---|
| Portugal     | kindergarten children   | x | x | x |   |   |   |
| USA          | preschoolers            |   |   |   |   |   | x |
| USA          | preschoolers            | x | x | x | x | x | x |
| Portugal     | primary school children |   |   | x |   |   |   |
| Malaysia     | school children         | x |   |   | x | x | x |
| Portugal     | school children         |   |   |   |   |   |   |
| Portugal     | school children         |   |   | x |   |   |   |
|              |                         |   |   |   |   |   |   |
| Albania      | adults                  |   |   |   |   |   |   |
| Austria      | adults                  |   |   |   |   |   | x |
| Brazil       | adults                  |   |   | x |   |   |   |
| Hungary      | adults                  |   |   | x |   |   |   |
| Lebanon      | adults                  | x | x | x | x | x | x |
| New Zealand  | adults                  | x |   |   | x |   | x |
| Philippines  | adults                  |   |   |   |   |   |   |
| Portugal     | adults                  |   |   | x |   |   |   |
| South Africa | adults                  | x |   |   |   |   |   |
| South Africa | adults                  |   |   | x |   | x |   |
| New Zealand  | older adults            |   |   |   |   |   | x |
| New Zealand  | older adults            |   |   |   |   |   | x |
|              |                         |   |   |   |   |   |   |
| Portugal     | secondary children      |   |   | x |   |   |   |
| USA          | adolescents             | x |   | x | x | x |   |
| Georgia      | children 12-18 y        |   |   |   |   |   | x |
| Nigeria      | children 12-18 y        |   |   |   |   |   | x |
| China        | children 13-17 y        | x |   |   | x | x | x |

## Online Supporting Material

**Supplemental Table 4.** Descriptive detail illustrating examples of the rationale provided for snacking recommendations by global, regional and national organizations as grouped into similar categories.

| Rationale                                               | Example text                                                                                                                                                                                                                                                                                                                                                                                                                                                                                                                                                                                                                                                                                                             | Target population group                       | Sources                                                                    |
|---------------------------------------------------------|--------------------------------------------------------------------------------------------------------------------------------------------------------------------------------------------------------------------------------------------------------------------------------------------------------------------------------------------------------------------------------------------------------------------------------------------------------------------------------------------------------------------------------------------------------------------------------------------------------------------------------------------------------------------------------------------------------------------------|-----------------------------------------------|----------------------------------------------------------------------------|
| Addition of energy and/or nutrients (including fiber)   | <p>Snacking can add vitamins, minerals and other nutrients to the diet';</p> <p>'To ensure that everybody receives all the nutrients and other healthful substances their bodies require';</p> <p>'Snacks make a valuable contribution to energy and nutrient intake between main meals';</p> <p>' For many children—particularly those who are quite physically active—snacks can help round out their nutritional requirements and provide as much as one fourth of their calories'</p>                                                                                                                                                                                                                                | children (n=8);<br>general population (n=11)  | (15, 27, 30, 32, 46, 57, 61, 63, 64, 66, 70, 90, 94, 95, 99, 100, 102-104) |
| Achieving intakes of specific food groups or categories | <p>Most of the snacks should be fruits and vegetables, since most children do not eat the recommended 5 servings of fruits and vegetables each day';</p> <p>'Dairy foods are a great source of calcium, which helps to build strong bones and teeth. Most calcium is obtained from milk and other dairy products. Water should be the main drink served to kids in between meals. Water satisfies thirst and does not have any sugar. Milk provides key nutrients such as calcium and vitamin D. Fresh fruit juices are very healthy and contain lots of vitamin C. Fruit juices are rich in vitamins, minerals and cancer fighting compounds';</p>                                                                      | children (n=2),<br>general population (n=2)   | (27, 102, 104, 105)                                                        |
| Dental Health                                           | <p>To reduce dental decay, restrict the frequency of eating foods and drinking beverages with a high sugar content';</p> <p>'Sugary snacks increase frequency of sugary intake thereby increasing chances of getting tooth decay (dental caries) and obesity';</p> <p>'Choose snacks such as yoghurt and cheese, which are low in fermentable carbohydrate and promote tooth remineralisation';</p> <p>'Avoid cariogenic snacks';</p> <p>'Frequency of snacking on food with high sugar content is related to occurrence of caries';</p> <p>'Less sugar snacks result in less problems with dental caries/tooth decay';</p> <p>'If between meals sweets are enjoyed, then select only tooth friendly confectionery';</p> | children, (n=2),<br>general population (n=10) | (9,32,35,52, 57, 63, 65, 79, 81, 87, 103,105)                              |

## Online Supporting Material

|                        |                                                                                                                                                                                                                                                                                                                                                                                                                                                                                                                                                                                                                                                                                                              |                 |                               |
|------------------------|--------------------------------------------------------------------------------------------------------------------------------------------------------------------------------------------------------------------------------------------------------------------------------------------------------------------------------------------------------------------------------------------------------------------------------------------------------------------------------------------------------------------------------------------------------------------------------------------------------------------------------------------------------------------------------------------------------------|-----------------|-------------------------------|
| Avoidance of choking   | Avoid beans, nuts and other snacks which can choke in the trachea';<br>'Do not give small, hard foods such as whole nuts and large seeds until children are at least five years old to reduce the risk of choking'                                                                                                                                                                                                                                                                                                                                                                                                                                                                                           | children (n=3), | (23, 63, 102)                 |
| Energy & Performance   | 'Eat meals and snacks at regular intervals to sustain energy levels';<br>'If taking part in sport, then a healthy diet, including snacks and drinks, can help to support training and performance';<br>'Eating food regularly is also important for anyone who has an active lifestyle through work or exercise';<br>'Snacks or light meals help to keep individuals energized throughout the day. It's beneficial in some groups of people, for instance in young children who have small stomachs that can't take all the food they need during main meals'                                                                                                                                                | general (n=4)   | (4, 27, 57, 90)               |
| Growth & development   | Children need all five meals because of their increased metabolism and relatively small stomach';<br>'Older Children: might need 3 snacks: especially during the adolescent growth spurt. Offer children and young people three meals and two to three small snacks during the day to meet their energy and nutrient requirements for growth';<br>'It's beneficial in some groups of people, for instance in young children who have small stomachs that can't take all the food they need during main meals';<br>'A little child has a small stomach and 3 meals a day may not give him the required energy for his growth and development. Therefore it's very important to feed the child between meals'; | children (n=7)  | (1, 30, 31,57, 63,102, 106)   |
| Body Weight status     | Better weight control';<br>'Having small healthy snacks between meals helps in weight loss';<br>'How do you maintain correct body weight? Daily food allowance can be taken in 3 - 5 meals; 3 main meals and if necessary 2 healthy snacks in between';<br>'Frequent snacking has been linked to rising rates of overweight and obese adults';<br>'snacking on junk food: increase in the prevalence of obesity and chronic diseases'                                                                                                                                                                                                                                                                        | general (n=7)   | (27, 57, 62, 67, 80, 81, 105) |
| Reduce risk of disease | 'To reduce the risk of food-related diseases'                                                                                                                                                                                                                                                                                                                                                                                                                                                                                                                                                                                                                                                                | general (n=1)   | (32)                          |

## Online Supporting Material

|                                     |                                                                                                                                                                                                                                                                                                                                                                                                                                                                                                                                                                    |               |                                  |
|-------------------------------------|--------------------------------------------------------------------------------------------------------------------------------------------------------------------------------------------------------------------------------------------------------------------------------------------------------------------------------------------------------------------------------------------------------------------------------------------------------------------------------------------------------------------------------------------------------------------|---------------|----------------------------------|
| Glycemic management                 | 'Healthy snacks can help maintain your blood glucose (sugar) levels throughout the day, but these must not replace proper meals';<br>'Better control of blood sugar'                                                                                                                                                                                                                                                                                                                                                                                               | general (n=3) | (4, 27, 81)                      |
| Rationale for snacks to limit/avoid | 'Processed snacks that contain Trans fats and high salt content are possible risk factors for hyperlipidemia and cardiovascular diseases';<br>'Benefits of less salty snacks: good control of blood pressure, decreased risk of heart and blood vessel diseases';<br>'Benefits of less sugary snacks: better weight control, good control of blood pressure levels; more energy and vitality';<br>'Higher energy and fat';<br>'To limit intake of oil'                                                                                                             | general (n=8) | (9, 13, 35, 42, 67, 79, 82, 108) |
| Other                               | 'It (snacking) fulfils both nutritional and social needs';<br>'Limiting foods and drinks which contain a lot of calories, fat, sugar or salt are important ways to respect your body';<br>'A sensible snack ideally consists of local, seasonal products';<br>'A sensible snack should be packed, if possible, in a reusable container to keep snacks fresh and save on packaging';<br>'Helps keep hunger at bay';<br>'Because of their ingredients, ultra-processed foods—such as packaged snacks, soft drinks, and instant noodles—are nutritionally unbalanced' | general (n=5) | (13, 15, 57, 85, 104)            |

## Online Supporting Material

### Supplemental References

1. Department of Public Health. Recommendations on Healthy Nutrition in Albania. 2008 (cited 2015 Jul 23). Available from: <http://www.fao.org/3/a-as658e.pdf>.
2. National Health and Medical Research, Department of Health and Aging. Eat for Health: Australian Dietary Guidelines summary. Australia 2013 (cited 2016 Dec 19). Available from: [https://www.eatforhealth.gov.au/sites/default/files/files/the\\_guidelines/n55a\\_australian\\_dietary\\_guidelines\\_summary\\_book.pdf](https://www.eatforhealth.gov.au/sites/default/files/files/the_guidelines/n55a_australian_dietary_guidelines_summary_book.pdf).
3. Bundesministerium für Gesundheit. GESUNDHEIT: öffentliches Gesundheitsportal österreichs. Die gesunde Mahlzeit, 2014.(cited 2015 May 5). Available from: [https://www.gesundheit.gv.at/Portal.Node/ghp/public/content/Gesunde\\_MahlzeitLN.html](https://www.gesundheit.gv.at/Portal.Node/ghp/public/content/Gesunde_MahlzeitLN.html).
4. Bundesministerium für Gesundheit. Fette Snacks, Süßes und Salziges GESUNDHEIT: öffentliches Portal österreichs 2014. (cited 2015 May 5). Available from: [https://www.gesundheit.gv.at/Portal.Node/ghp/public/content/Fette\\_Snacks\\_Suesses\\_und\\_SalzigesLN.html](https://www.gesundheit.gv.at/Portal.Node/ghp/public/content/Fette_Snacks_Suesses_und_SalzigesLN.html)
5. Bundesministerium für Gesundheit. Richtige Ernährung für mein Kind - leicht gemacht. 2014 (cited 2015 Jul 10). Available from: [http://bmg.gv.at/cms/home/attachments/6/0/9/CH1048/CMS1288884736931/richtige\\_ernaehrung\\_fuer\\_mein\\_kind.pdf](http://bmg.gv.at/cms/home/attachments/6/0/9/CH1048/CMS1288884736931/richtige_ernaehrung_fuer_mein_kind.pdf).
6. GESUNDHEIT: öffentliches Gesundheitsportal österreichs Gesunde Rezepte für den Arbeitsalltag. Bundesministerium für Gesundheit, 2014. (cited 2015 May 5) Available from: <https://www.gesundheit.gv.at/Portal.Node/ghp/public/content/ernaehrung-gesunde-rezepte-arbeitsalltag-LN.html>
7. Federal Public Service Health, Food Chain Safety and Environment. Guide Generale: Vivement recommandé pour jeunes et moins jeunes. 2005a. (cited 2016 Dec 17). Available from : <http://www.fao.org/3/a-as664f.pdf>
8. Federal Public Service Health, Food Chain Safety and Environment. Guide 2. Vivement recommandé pour enfants de 3 à 12 et leurs parents. 2005b. (cited 2016 Dec 17). Available from: <http://www.fao.org/3/a-as666f.pdf>
9. Ministry of Health. Food-Based Dietary Guidelines for Belize. Belize 2012. (cited 2015 Jul 28) Available from: <http://www.fao.org/3/a-as852e.pdf>.
10. Sociedade Brasileira de Pediatria. Manual de Orientação. Departamento de Nutrologia. Rio de Janeiro: 2012.
11. Departamento Científico de Nutrologia Sociedade Brasileira de Pediatria. Lanche Saudável - Manual de orientação. Sao Paulo, 2012.
12. Philippi S. Redesenho da Pirâmide Alimentar Brasileira para uma alimentação saudável. Brazil. 2013.
13. Ministry of Health of Brazil. Dietary Guidelines for the Brazilian population In: Ministry of Health of Brazil, Secretariat of Health Care, Primary Health Care Department, ed. Brazil: Ministry of Health, 2014. (cited 2016 Dec 12). Available from: [http://189.28.128.100/dab/docs/portaldab/publicacoes/guia\\_alimentar\\_populacao\\_inql.es.pdf](http://189.28.128.100/dab/docs/portaldab/publicacoes/guia_alimentar_populacao_inql.es.pdf)
14. Health Canada. Canada's Food Guide. Ottawa, Ontario: Health Canada, 2011. (cited 2016 Dec 19). Available from: [http://www.hc-sc.gc.ca/fn-an/alt\\_formats/hpfb-dgpsa/pdf/food-guide-aliment/view\\_eatwell\\_vue\\_bienmang-eng.pdf](http://www.hc-sc.gc.ca/fn-an/alt_formats/hpfb-dgpsa/pdf/food-guide-aliment/view_eatwell_vue_bienmang-eng.pdf)
15. Health Canada. Canada`s Food Guide: Smart Snacking. Health Canada, 2007.
16. Health Canada. Eating Well with Canada`s Food Guide First Nations, Inuit and Métis. Health Canada, 2007. (cited 2015 Jul 13). Available from: [http://www.hc-sc.gc.ca/fn-an/alt\\_formats/fnihb-dgspni/pdf/pubs/fnim-pnim/2007\\_fnim-pnim\\_food-guide-aliment-eng.pdf](http://www.hc-sc.gc.ca/fn-an/alt_formats/fnihb-dgspni/pdf/pubs/fnim-pnim/2007_fnim-pnim_food-guide-aliment-eng.pdf)

## Online Supporting Material

17. Health Canada. Canada's Food Guide: Children. (cited 2015 Jul 13). Available from: <http://www.hc-sc.gc.ca/fn-an/food-guide-aliment/choose-choix/advice-conseil/child-enfant-eng.php>
18. Health Canada. Canada's Food Guide: Sample one-day menu for David, a 10-year-old boy. (cited 2015 Jul 13). Available from: <http://www.hc-sc.gc.ca/fn-an/food-guide-aliment/choose-choix/advice-conseil/boy-garcon-10-eng.php>
19. Health Canada. Canada's Food Guide: Sample one-day menu for Eric, a 7-year-old boy. (cited 2015 Jul 13). Available from: <http://www.hc-sc.gc.ca/fn-an/food-guide-aliment/choose-choix/advice-conseil/boy-garcon-7-eng.php>.
20. Health Canada. Canada's Food Guide: Sample one-day menu for Isabelle, a 12-year-old girl (cited 2015 Jul 13). Available from: <http://www.hc-sc.gc.ca/fn-an/food-guide-aliment/choose-choix/advice-conseil/girl-fille-12-eng.php> .
21. Universidad de Chile and Ministry of Health. Feeding Guide for Children under 2 years of age, Feeding Guide for children up to adolescence. 2005.(cited 2015 Jan 20). Available from: [https://www.inta.cl/Consumidores/Revistas/guia\\_menor\\_de\\_2.pdf](https://www.inta.cl/Consumidores/Revistas/guia_menor_de_2.pdf)
22. Chinese Nutrition Society and Ministry of Health. Food-based dietary guidelines - China. 2015. (cited 2015 Jul 20). Available from: <http://dq.en.cnsoc.org/>.
23. National Institute for Nutrition and Health: Chinese Center for Disease Control and Prevention. Chinese children and adolescents snacking guidance China Nutrition, 2008.(cited 2015 Aug 24). Available from: [http://www.chinanutri.cn/yjzkzxp/yjkkpz/xcc/k/xinxi/201501/t20150115\\_109864.html](http://www.chinanutri.cn/yjzkzxp/yjkkpz/xcc/k/xinxi/201501/t20150115_109864.html)
24. Ministry of Health. Food-based dietary guidelines - Croacia. (cited 2017 Jul 27). Available from <http://www.fao.org/3/a-as670o.pdf>.
25. DTU Food, National Food institute. Guidelines for Healthy Snacks. Denmark 2012. (cited 2017 Feb 24). Available from: [http://www.food.dtu.dk/english/news/2012/04/guidelines\\_for\\_healthy\\_snacks?id=38ef277c-d365-4cb9-be4a-2a9b5e56e3bd](http://www.food.dtu.dk/english/news/2012/04/guidelines_for_healthy_snacks?id=38ef277c-d365-4cb9-be4a-2a9b5e56e3bd)
26. Health Promotion Department Ministry of Health & Social Security. Dominica Food Based Dietary Guidelines. Dominica 2007. (cited 2015 Jul 28) Available from: <http://www.fao.org/3/a-as853e.pdf>.
27. Ministry of Health, National Food and Nutrition Centre. Food and Health Guidelines for Fiji. Fiji 2013 (cited 2015 Jul 20) Available from: <http://www.fao.org/3/a-as883e.pdf>
28. Institut national de prévention et d'éducation pour la santé, Ministère Chargé de la Santé. Recommendations du PNNS pour les enfants et les adolescents. 2015. (cited 2015 Oct 30). Available from: <http://www.inpes.sante.fr/CFESBases/catalogue/pdf/1387.pdf> .
29. Institut national de prévention et d'éducation pour la santé. La santé vient en mangeant. Le guide alimentaire pour tous. In: santé. Indpedépl, ed. Vanves: INPES, 2011. (cited 2016 Dec 19). Available from: <http://inpes.santepubliquefrance.fr/CFESBases/catalogue/pdf/581.pdf>.
30. Public Health Department; Ministry of Labor, Health and Social Affairs. Healthy eating - The main key to health. Georgia 2005. (cited 2015 Jul 27). Available from: <http://www.fao.org/3/a-as682e.pdf>.
31. AID. Artikel zum Thema aid-Ernährungspyramide. aid, 2013. (cited 2015 Feb 13). Available from: <http://www.aid.de/inhalt/wann-esse-ich-986.html>.
32. Bundesministerium für Ernährung und Landwirtschaft Die zehn Regeln der DGE. Germany, 2014. (cited 2015 Jul 13). Available from: <http://www.bmel.de/DE/Ernaehrung/GesundeErnaehrung/ArbeitFreizeit/Texte/DossierArbeitUndFreizeit.html?docId=5048102>.
33. Supreme Scientific Health Council, Ministry of Health and Welfare . Dietary guidelines for adults in Greece. National and Kapodistrian University of Athens, School of Medicine 2010. (cited 2015 Jul 29) Available from: [http://www.nut.uoa.gr/dietaryENG3.html?sm\\_au\\_#iVvkVvnfDSkMRn7M](http://www.nut.uoa.gr/dietaryENG3.html?sm_au_#iVvkVvnfDSkMRn7M)
34. Jeppesen C BP, Young K. Food-based dietary guidelines in circumpolar regions. 2011 (cited 2016 Dec 19). Available from:

## Online Supporting Material

- [http://www.circumpolarhealthjournal.net/public/journals/32/chs/CHS\\_2011\\_8.pdf](http://www.circumpolarhealthjournal.net/public/journals/32/chs/CHS_2011_8.pdf).
35. Instituto de Nutricion de Centro America Y Panama. Food -Based Dietary Guidelines for Grenada. Grenada 2006. (cited 2015 Jul 28). Available from: <http://www.fao.org/nutrition/education/food-dietary-guidelines/regions/countries/grenada/en/>
  36. Imre R. Dietary Gidelines to the Adult Population in Hungary. 2001. (cited 2017 Apr 12) Available from: <http://www.fao.org/3/a-as684o.pdf>
  37. Centre for Chronic Disease Control. Sample Menu - Northern India. 2006. (cited 2015 Jul 13) Available from: <http://foodpyramidindia.org/sm-northern.html>
  38. Centre for Chronic Disease Control. Sample menu - Southern India. 2006. (cited 2015 Jul 13). Available from: <http://foodpyramidindia.org/sm-southern.html>.
  39. Centre for Chronic Disease Control. Sample Menu - Western India. 2006. (cited 2015 Jul 13). Available from: <http://foodpyramidindia.org/sm-gujarati.html>.
  40. Centre for Chronic Disease Control D. Sample Menu - Assam. 2006. (cited 2015 Jul 13). Available from: <http://foodpyramidindia.org/sm-assam.html>.
  41. Centre for Chronic Disease Control. Sample Menu - Jain. 2006. (cited 2015 Jul 13). Available from: <http://foodpyramidindia.org/sm-jain.html>.
  42. Centre for Chronic Disease Control. Northern India Food Guide. 2006. (cited 2015 Jul 13). Available from: <http://foodpyramidindia.org/fghl-north-india.html>.
  43. Centre for Chronic Disease Control. Southern India. 2006. (cited 2015 Jul 13). Available from: <http://foodpyramidindia.org/fghl-south-india.html>.
  44. Centre for Chronic Disease Control. Western India. 2006.(cited 2015 Jul 13). Available from: <http://foodpyramidindia.org/fghl-western-india.html>.
  45. Centre for Chronic Disease Control. Assam. 2006.( cited 2015 Jul 13). Available from: <http://foodpyramidindia.org/fghl-northern-india.html>.
  46. Centre for Chronic Disease Control. Jain Food Guide. 2006.(cited 2015 Jul 13). Available from: <http://foodpyramidindia.org/fghl-jain-india.html>.
  47. National Institute of Nutrition. Dietary Guidelines for Indians - A Manual 2011. (cited 2015 July 20). Available from: <http://ninindia.org/DietaryGuidelinesforNINwebsite.pdf>
  48. Food Safety Authority of Ireland. Scientific Recommendations for Healthy Eating Guidelines in Ireland. FSAI 2011.
  49. Healthy Ireland and Department of Health and Children. The Food Pyramid. Healthy Ireland 2016.(cited 2016 Dec 17). Available from: [http://www.healthyireland.ie/wp-content/uploads/2016/12/M9617-DEPARTMENT-OF-HEALTH\\_Food-Pyramid-Poster\\_Complex-Version.pdf](http://www.healthyireland.ie/wp-content/uploads/2016/12/M9617-DEPARTMENT-OF-HEALTH_Food-Pyramid-Poster_Complex-Version.pdf)
  50. Ministry of Health, Labour, Welfare and Ministry of Agriculture, Forestry and Fisheries. Japanese Food Guide Spinning Top. Japan 2010. (cited 2015 Jul 13). Available from: <http://www.mhlw.go.jp/bunya/kenkou/pdf/eiyousyokuji5.pdf>
  51. National Council for Scientific Excellence. Food-Based Dietary Guidelines. Lebanon, Draft2013. (cited 2015 Jul 13). Available from: [http://www.cnrs.edu.lb/FAFS\\_FBDG\\_Nahla\\_Book\\_En.pdf](http://www.cnrs.edu.lb/FAFS_FBDG_Nahla_Book_En.pdf) .
  52. Ministry of Health. National Nutrition Guidelines for Malawi. 2007. (cited 2015 Aug 25). Available from: [http://www.unicef.org/malawi/MLW\\_resources\\_nutritionguidelines.pdf](http://www.unicef.org/malawi/MLW_resources_nutritionguidelines.pdf).
  53. Ministry of Health Malaysia. My Health for Life. MyHealth2015. (cited 2015 Jul 15). Available from: <http://myhealth.gov.my/index.php/en/oral-health/general/snacking>
  54. Ministry of Health Malaysia. Malaysian Dietary Guidelines2010. Available from: <http://www.moh.gov.my/images/gallery/GarisPanduan/diet/KM1.pdf>.
  55. Ministry of Health Malaysia. Choosing Healthy Foods for School Children My Health2012.(cited 2015 Jul 20). Available from; <http://myhealth.gov.my/index.php/en/nutrition/kids/choosing-healthy-foods-for-school-children>
  56. Ministry of Health Malaysia. Healthy Packed Food for School Children My Health, 2012. (cited 2016 Apr 19). Available from: <http://myhealth.gov.my/index.php/en/nutrition/kids/bekalan-makanan-sihat-untuk->

## Online Supporting Material

- [kanak-kanak-sekolah](#)
57. Ministry of Health Malaysia. Planning Healthy Menu for School Children. Malaysia My Health 2012. (cited 2015 Jul 20). Available from: <http://myhealth.gov.my/index.php/en/nutrition/kids/planning-healthy-menu-for-school-children>
  58. Ministry of Health Malaysia. Healthy Snack. My Health 2008. (cited 2017 Jan 25). Available from: <http://myhealth.gov.my/index.php/en/healthy-snacks>.
  59. Ministry of Health Malaysia. Snacking. My Health, 2015. (cited 2015 Jul 20) Available from: <http://myhealth.gov.my/index.php/en/oral-health/general/snacking>
  60. Secretaria de salud. NORMA Oficial Mexicana NOM-043-SSA2-2012, Servicios básicos de salud. Promoción y educación para la salud en materia alimentaria. Criterios para brindar orientación. Diario Oficial 2013.
  61. Secretaria de salud. Guía de Alimentos para la Población Mexicana. Mexico 2010.
  62. Ministry of Health and Social Services. Food and Nutrition Guidelines for Namibia. Namibia. 2000. (cited 2016 Dec 8). Available from: <http://www.fao.org/3/a-as839e.pdf>
  63. Health Council of the Netherlands. Guidelines for a healthy diet 2006. The Hague: Health Council of the Netherlands, 2006. (cited 2017 Jan 17). Available from: [http://www.voedingscentrum.nl/Assets/Uploads/voedingscentrum/Documents/Professionals/Voedselvoorlichting/06\\_Richtlijnen%20Goede%20Voeding%20Gezondheidsraad%202006.pdf](http://www.voedingscentrum.nl/Assets/Uploads/voedingscentrum/Documents/Professionals/Voedselvoorlichting/06_Richtlijnen%20Goede%20Voeding%20Gezondheidsraad%202006.pdf)
  64. Ministry of Health. Food and Nutrition Guidelines for Healthy Children and Young People (Aged 2-18 years): A background paper. New Zealand. 2012 (cited 2015 Jul 29). Available from: <http://www.health.govt.nz/system/files/documents/publications/food-nutrition-guidelines-healthy-children-young-people-background-paper-feb15-v2.pdf>.
  65. Ministry of Health. Food and Nutrition Guidelines for Healthy Older People: A background paper. New Zealand 2013 January 31. (cited 2015 Jul 29) Available from: <http://www.health.govt.nz/system/files/documents/publications/food-nutrition-guidelines-healthy-older-people-background-paper-v2.pdf> .
  66. Ministry of Health. Classifying foods and drinks for early childhood education services. New Zealand 2013. (cited 2015 Jul 26) Available from: <http://www.health.govt.nz/system/files/documents/pages/heha-ece-user-guide-section2.pdf>.
  67. Ministry of Health. Food and Nutrition Guidelines for Healthy Adults: A Background Paper. New Zealand 2013. (cited 2015 Jul 8) Available from: <https://www.health.govt.nz/system/files/documents/publications/foodandnutritionguidelines-adults.pdf>
  68. Nutrition Division, Federal Ministry of Health. Food Based Dietary Guidelines for Nigeria: A Guide to Healthy Eating. 2006. (cited 2015 Jul 23) Available from: <http://www.fao.org/3/a-as841e.pdf>
  69. Department of Nutrition, Ministry of Health. The Omani Guide to Healthy Eating. 2009. (cited 2016 Dec 17) Available from: <http://www.fao.org/3/a-as845e.pdf>.
  70. Food and Nutrition Research Institute .Pinggang Pinoy: healthy food plate for Filipino adults. 2014.(cited 2015 Jul 20). Available from: <http://202.90.141.88/pdf/pinggangpinoy.pdf>
  71. Faculty of Food Sciences University of Porto and National Council for Food and Nutrition MoH. Food-based dietary guidelines – Portugal. 2003. (cited 2016 Dec 17). Available from: [www.fao.org/3/a-ax4330.pdf](http://www.fao.org/3/a-ax4330.pdf).
  72. Canedeias V NE, Morais C, Cabral M, Ribeiro da Silva P. Principos para uma Alimentacao Saudavel. Lisboa: Portuguese Office of Health (POH) (Direção Geral de Saúde – DGS), 2005
  73. Nunes E BJ. Manual para uma alimentacao saudavel em jardins de infancia. Lisboa: Direccao Geral de Saude, 2001 972-9425-94-9.
  74. Portugese Association of Nutritionists. Lanches Escolares Guia de Bolso. Portugal 2012.



## Online Supporting Material

75. Supreme Council of Health. Qatar Dietary Guidelines. Doha, 2015. (cited 2017 Jan 17). Available from: <http://www.fao.org/3/a-az908e.pdf>
76. Russian Ministry of Health. Guidelines on preventive measures for health protection and promotion of pupils/students in educational institutions. Russia. 2008. (cited 2015 Sept 26). Available from: <http://www.rosminzdrav.ru/documents/7768-rekomendatsii-206-vs-ot-15-yanvarya-2008-g>
77. General Directorate of Nutrition, Ministry of Health. Dietary Guidelines for Saudis. The Healthy Food Palm. Saudi Arabia 2012.(cited 2016 Dec 19). Available from: <http://www.moh.gov.sa/en/Ministry/MediaCenter/Publications/Documents/final%20english%20%20الكتاب%20العلمي%20انجليزي.pdf>
78. National Nutrition Week South Africa. Meal & Snack Samples. Nutrition Week; 2014. (Cited 2015 Sep 1). Available from: <http://www.nutritionweek.co.za/NNW2014/meal-and-snack-samples>.
79. National Nutrition Week South Africa. Meal example for an inactive female adult. nutritionweek: Nutrition Week; 2014. (cited 2015 Sep 1). Available from: <http://www.nutritionweek.co.za/NNW2014/docs/NNW-Message-1.pdf>
80. National Nutrition Week South Africa. Make portion control a daily way of life. nutritionweek: Nutrition Week; 2014. (cited 2015 Sep 1). Available from: <http://www.nutritionweek.co.za/NNW2014/docs/NNW-Message-2.pdf>
81. Department of Health, Republic of South Africa. Food-Based Dietary Guidelines for South Africa. S Afr J Clin Nutr 2013;26(3)(Supplement): S1-S164.
82. Nutrition Division, Ministry of Health. Food based dietary guidelines for Sri Lankans. 2011. (cited 2015 Jul 20). Available from: [www.fao.org/3/a-as886e.pdf](http://www.fao.org/3/a-as886e.pdf).
83. Health promotion Unit; Ministry of Health Social Services, Community Development, Culture and Gender Affairs. Food-based dietary guidelines for St. Kitts and Nevis. St. Kitts and Nevis 2010. ( cited 2015 Jul 28). Available from: <http://www.fao.org/3/a-as858e.pdf>.
84. Ministry of Health, Human Services and Family Affairs. Dietary guidelines for Saint Lucia. Saint Lucia 2007. (cited 2015 Jul 28). Available from: <http://www.fao.org/3/a-as860e.pdf>.
85. Ministry of Health and Environment. Dietary guidelines for St. Vincent and the Grenadines. St Vincents and Grenadine 2006. (cited 2015 Jul 28). Available from: <http://www.fao.org/3/a-as861e.pdf> .
86. Livsmedelsverket: National Food Agency. Find your way to eat greener, not too much and be active. Sweden 2015 (cited 2015 Aug 15). Available from: <http://www.livsmedelsverket.se/globalassets/english/food-habits-health-environment/dietary-guidelines/kostrad-eng.pdf?id=8140>.
87. Bundesamt Fur Gesundhat. Conseils pour des dix-heures et des gouters sains. 2012. (cited 2015 Jul 13). Available from: [http://www.sge-ssn.ch/media/sb\\_znueinblatt\\_2012\\_en\\_web.pdf](http://www.sge-ssn.ch/media/sb_znueinblatt_2012_en_web.pdf).
88. Working Group on Food-Based Dietary Guidelines for Thai People. Manual Nutrition Flag Healthy eating for Thais. Thailand 2001. (cited 2015 Jul 20). Available from: <http://www.fao.org/3/a-as979e.pdf> .
89. Ministry of Health. Dietary guidelines for Turkey. Turkey 2006 , (cited 2016 Dec 17) <http://www.fao.org/nutrition/education/food-dietary-guidelines/regions/countries/turkey/en/> .
90. NHS change 4 life. Healthier Snack Ideas. (cited 2015 Jul 8). Available from: <http://www.nhs.uk/Change4Life/Pages/healthy-snacks.aspx> .
91. NHS change 4 life Healthy snack tips for kids. (cited 2015 Jul 8). Available from: <http://www.nhs.uk/Change4Life/Pages/healthy-snacks-for-kids.aspx>
92. British Nutrition Foundation. Healthy Snacking. Nutrition, 2015. (cited 2015 Jul 8). Available from: <http://www.nutrition.org.uk/healthyliving/healthyeating/snacking.html?limitstart=0>.
93. British Nutrition Foundation. Putting it into practice. nutrition, 2015. (cited 2015 Jul 8). Available from: <https://www.nutrition.org.uk/healthyliving/healthyeating/practice.html>.

## Online Supporting Material

94. Public Health England The Eatwell Guide. Helping you to eat a healthy balanced diet. 2016.(cited 12.1.2017) Available from: [www.gov.uk/government/uploads/system/uploads/attachment\\_data/file/551502/Eatwell\\_Guide\\_booklet.pdf](http://www.gov.uk/government/uploads/system/uploads/attachment_data/file/551502/Eatwell_Guide_booklet.pdf)
95. Ukraine Ministry of Health. Guidelines for general practitioners and family doctors on recommending to patients the basic principles of healthy nutrition. Ukraine 2013 (cited 2015 Sep 26). Available from: [http://www.moz.gov.ua/ua/portal/dn\\_20130114\\_0016.html](http://www.moz.gov.ua/ua/portal/dn_20130114_0016.html).
96. US Department of Agriculture. Scientific report of the 2015 Dietary Guidelines Advisory Committee. Washington (DC): US Department of Health and Health Services; 2015.
97. US Department of Agriculture. US Department of Health and Health Services. Dietary Guidelines for Americans 2010. 7<sup>th</sup> ed. Washington (DC): US Government Printing Office, 2010.
98. US Department of Agriculture. Got your dairy today? Choose MyPlate, 2011.(cited 2015 Jun 24). Available from: <http://www.choosemyplate.gov/food-groups/downloads/TenTips/DGTipsheet5GotYourDairyToday.pdf>
99. US Department of Agriculture. Make half your grains whole. Choose MyPlate, 2011.(cited 2015 Jun 24). Available from: <http://www.choosemyplate.gov/food-groups/downloads/TenTips/DGTipsheet4MakeHalfYourGrainsWhole.pdf>
100. US Department of Agriculture. US Department of Health and Health Services. Dietary Guidelines for Americans 2010. 7<sup>th</sup> ed. Washington (DC): US Government Printing Office, 2010.
101. US Department of Agriculture. Build healthy mealtime habits. Choose MyPlate, 2015. (cited 2015 Jun 24). Available from: <http://www.choosemyplate.gov/food-groups/downloads/TenTips/DGTipsheet38BuildHealthyMealtimeHabits.pdf>
102. US Department of Agriculture. Cut back on your kid's sweet treats 10 tips to decrease added sugars. Choose MyPlate, 2011. (cited 2015 Jun 24). Available from: <http://www.choosemyplate.gov/food-groups/downloads/TenTips/DGTipsheet13CutBackOnSweetTreats.pdf>
103. US Department of Agriculture. Mini-fridge. Choose myplate, 2013. (cited 2015 Jun 24). Available at: <http://www.choosemyplate.gov/food-groups/downloads/TenTips/DGTipsheet27MiniFridgeMakeover.pdf>
104. American Academy of Pediatrics. Choosing Healthy Snacks for children. 2015. (cited 2016 Dec 12). Available from: <https://www.healthychildren.org/English/healthy-living/nutrition/Pages/Choosing-Healthy-Snacks-for-Children.aspx>
105. Nordic Council of Ministers. Nordic Nutrition Recommendations 2012 Integrating nutrition and physical activity. Copenhagen: 2012 978-92-893-2670-4.
106. WHO Regional Office for the Eastern Mediterranean. Promoting a healthy diet for the WHO Eastern Mediterranean Region. User-friendly guide. Cairo: 201.
107. WHO. Healthy Diet Fact sheet N°394. World Health Organization, 2015. (cited 2016 Dec 12). Available from: <http://www.who.int/mediacentre/factsheets/fs394/en/>
108. WHO. Regional Consultation on Food-Based Dietary Guidelines for countries in the Asia Region World Health Organization 2011. (cited 2015 July 10). Available from: [http://apps.searo.who.int/PDS\\_DOCS/B4818.pdf](http://apps.searo.who.int/PDS_DOCS/B4818.pdf) .
109. WHO. Diet, Nutrition and the Prevention of Chronic Diseases. World Health Organisation Technical Report Series No 916. Geneva, 2003. (cited 2016 Dec 12). Available from: [http://apps.who.int/iris/bitstream/10665/42665/1/WHO\\_TRS\\_916.pdf](http://apps.who.int/iris/bitstream/10665/42665/1/WHO_TRS_916.pdf) .
110. FAO. Developing Food Based Dietary Guidelines. A Manual from the English Speaking Caribbean. FAO, 2007. (cited 2016 Dec 19). Available from: <ftp://ftp.fao.org/docrep/fao/010/ai800e/ai800e00.pdf>
